# Supplementary material
Source: PubMed Central journal article supplement (PMC10080407)
Supplement: jamaoncol-e230161-s003.pdf [file jamaoncol-e230161-s003.pdf]

## Data Sharing Statement

Tang. Addition of Metastasis-Directed Therapy to Intermittent Hormone Therapy for Oligometastatic Prostate Cancer. *JAMA Oncol.* Published April 06, 2023.

doi:10.1001/jamaoncol.2023.0161

### Data

**Data available:** Yes

**Data types:** Deidentified participant data, Data dictionary

**How to access data:** Please email the corresponding author at [ctang1@mdanderson.org](mailto:ctang1@mdanderson.org)

**When available:** With publication

### Supporting Documents

**Document types:** None

### Additional Information

**Who can access the data:** Research who proposed use of the data has been approved after approval of material transfer agreement

**Types of analyses:** For general research purposes

**Mechanisms of data availability:** with a signed data access agreement and/or material transfer agreement
